# Supplementary material for: OsJAZ4 Fine-Tunes Rice Blast Resistance and Yield Traits
Source: MDPI journal article supplement (doi:10.3390/plants13030348), 2024-01-24
Supplement: s1 [file s1]

**Table S1. List of primers used in this study**

| Primer Name                        | Primers(5'-3')           | Source     |
|------------------------------------|--------------------------|------------|
| <b>For CRISPR/Cas9</b>             |                          |            |
| OsJAZ4-Cas9-F                      | ATGTATTCAACAACGTCTCGC    | This paper |
| OsJAZ4-Cas9-R                      | AATAGGCATACCTCTCGGC      | This paper |
| <b>qRT-PCR for gene expression</b> |                          |            |
| OsJAZ1-RT-F                        | GCGTTCATTGTTTAGATGGTGT   | This paper |
| OsJAZ1-RT-R                        | GCACATAAGGAACAGTACAACG   | This paper |
| OsJAZ2-RT-F                        | CGAGGACGATCATATCCATGG    | This paper |
| OsJAZ2-RT-R                        | CTCGTCTTCCTCTTCTCGAG     | This paper |
| OsJAZ3-RT-F                        | CCTGGTGATCATTGTATACCGA   | This paper |
| OsJAZ3-RT-R                        | TCATCATACCCTAACACGGATG   | This paper |
| OsJAZ4-RT-F                        | CTACCACTGCTGCAGCTATTAT   | This paper |
| OsJAZ4-RT-R                        | GTCAAATGAGCAATTGTCCCTT   | This paper |
| OsJAZ5-RT-F                        | CAAGTCTTTTCTTGCGAAGGAA   | This paper |
| OsJAZ5-RT-R                        | CGATCGATCAACACTAACACAGG  | This paper |
| OsJAZ6-RT-F                        | TGACTCGAGTGATTCATGAACA   | This paper |
| OsJAZ6-RT-R                        | CGTAGAAGATGGTTAATTGGCG   | This paper |
| OsJAZ7-RT-F                        | TGCTTCTGATATGCCTATTGCT   | This paper |
| OsJAZ7-RT-R                        | TATGGCGTCTTTGCATTAAGAC   | This paper |
| OsJAZ8-RT-F                        | ATGAATGCAAATGCTCCATACC   | This paper |
| OsJAZ8-RT-R                        | AGATCACTTGACACTTGACAGT   | This paper |
| OsJAZ9-RT-F                        | ATATGTGATCAGCGACGTACAG   | This paper |
| OsJAZ9-RT-R                        | AAC TAAGCACAAGCACAAAGAG  | This paper |
| OsJAZ10-RT-F                       | ACTCAA AACCACCAA AACTCAC | This paper |
| OsJAZ10-RT-R                       | CATCGCCATATCAACAAACACT   | This paper |
| OsJAZ11-RT-F                       | AGTACATGAAGGAGCACAGTG    | This paper |
| OsJAZ11-RT-R                       | CTTCCTTTCTTGCGTGTCTTTC   | This paper |
| OsJAZ12-RT-F                       | CTCGGGCTCTGAAGATTTATCT   | This paper |
| OsJAZ12-RT-R                       | TTGGGCCAAAGAAATCTCAAAC   | This paper |
| OsJAZ13-RT-F                       | ACACGTCAGCTTTAATCCCATA   | This paper |
| OsJAZ13-RT-R                       | AGGAATAATCGTGCACTGTACA   | This paper |
| OsJAZ14-RT-F                       | GTCCGTGGAGAAGAGAAGTC     | This paper |
| OsJAZ14-RT-R                       | AGCTCGAATTCAGTAGAACGC    | This paper |
| OsJAZ15-RT-F                       | CCATTGACCATCGTCTACGG     | This paper |
| OsJAZ15-RT-R                       | CACTTTTGCTTCCTCTTTTGGA   | This paper |
| OsActin-RT-F                       | TGTATGCCAGTGGTCGTACCA    | [67]       |
| OsActin-RT-R                       | CCAGCAAGGTCGAGACGAA      | [67]       |
| OsUbiquitin-RT-F                   | GCCCAAGAAGAAGATCAAGAAC   | [68]       |

|                  |                              |            |
|------------------|------------------------------|------------|
| OsUbiquitin-RT-R | AGATAACAACGGAAGCATAAAAGTC    | [68]       |
| Os04g10010-RT-F  | AAATGATTTGGGACCAGTCG         | [69]       |
| Os04g10010-RT-R  | GATGGAATGTCCTCGCAAAC         | [69]       |
| OsNAC4-RT-F      | TCCTGCCACCATTCTGAGATG        | [69]       |
| OsNAC4-RT-R      | TTGCAGAATCATGCTTGCCAG        | [69]       |
| OsWRKY45-RT-F    | CGGGTAAAACGATCGAAAGA         | [70]       |
| OsWRKY45-RT-R    | GCTGAGACGACACATCAACAA        | [70]       |
| OsPR3-RT-F       | CTTGGACTGCTACAACCAGA         | This paper |
| OsPR3-RT-R       | CATTGTGGGCATTACTGATG         | This paper |
| OsAOS2-RT-F      | CAATACGTOTACTGGTCGAATGG      | [45]       |
| OsAOS2-RT-R      | AAGGTGICOTACCGGAGGAA         | [45]       |
| OsAOS1-RT-F      | TCCTCCGATACGACTCCTTC         | [45]       |
| OsAOS1-RT-R      | AGTGAAGAAGAAGAGGACGG         | [45]       |
| OsLOX-RT-F       | GCATCCCCAACAGCACATC          | [45]       |
| OsLOX-RT-R       | AATAAAGATTIGGGAGTGACATATTGG  | [45]       |
| OsOPR1-RT-F      | CAAAGGTCATTGTGCTCTTTGA       | This paper |
| OsOPR1-RT-R      | CTGAAGTCGTCGATGATCTGAG       | This paper |
| OsCPS1-RT-F      | CAGCCTCTATGAAGAAAATGGC       | This paper |
| OsCPS1-RT-R      | CACTTTTGACCTTCTCGAACTG       | This paper |
| OsKS1-RT-F       | CACTTTTCCTGGTATGCTTAGC       | This paper |
| OsKS1-RT-R       | CGGAGGTGAAGAAGTCTATCAA       | This paper |
| OsKO1-RT-F       | GAGATTTCTTCCCCTACCTCAG       | This paper |
| OsKO1-RT-R       | CCACACTAGCATCATTAGTTGC       | This paper |
| OsKAO-RT-F       | CATTTTCTCCTGGGTTACAAGC       | This paper |
| OsKAO-RT-R       | AGCGAGCATATCAAGACGAATA       | This paper |
| OsGA2ox1-RT-F    | AATACCACCACTCACTCTTAGC       | This paper |
| OsGA2ox1-RT-R    | CATGCATACTTTGACACGTAGG       | This paper |
| OsGA2ox2-RT-F    | GGAGTACAAGAGGACCATGTAC       | This paper |
| OsGA2ox2-RT-R    | CTATTCATGGTCGTCATCGTCC       | This paper |
| OsGA3ox1-RT-F    | TGATTGCAATTATCCATGCCAG       | This paper |
| OsGA3ox1-RT-R    | TCCTGGTTCTACAGTGAACTC        | This paper |
| OsGA3ox2-RT-F    | TCTCCAAGCTCATGTGGTCCGAGGGCTA | [71]       |
| OsGA3ox1-RT-R    | TGGAGCACGAAGGTGAAGAAGCCCGAGT | [71]       |
